# Supplementary material for: Accuracy of Artificial Intelligence Models in Dental Implant Fixture Identification and Classification from Radiographs: A Systematic Review
Source: MDPI journal article supplement (doi:10.3390/diagnostics14080806), 2024-04-11
Supplement: s1 [file s1]

**Table S1.** Quality Assessment (QUADAS-2) summary of Risk Bias and Applicability concerns

| Study                       | RISK OF BIAS                                                                        |                                                                                              |                                                                                               |                                                                                                  | APPLICABILITY CONCERNS                                                                |                                                                                       |                                                                                       |
|-----------------------------|-------------------------------------------------------------------------------------|----------------------------------------------------------------------------------------------|-----------------------------------------------------------------------------------------------|--------------------------------------------------------------------------------------------------|---------------------------------------------------------------------------------------|---------------------------------------------------------------------------------------|---------------------------------------------------------------------------------------|
|                             | PATIENT SELECTION                                                                   | INDEX TEST                                                                                   | REFERENCE STANDARD                                                                            | FLOW AND TIMING                                                                                  | PATIENT SELECTION                                                                     | INDEX TEST                                                                            | REFERENCE STANDARD                                                                    |
| Kong et al., 2023 [61]      |    |             |              |                 |    |    |    |
| Kong, 2023 [58]             |    |             |              |                 |    |    |    |
| Park et al., 2023 [62]      |    |             |              |                 |    |    |    |
| Hsiao et al., 2021 [63]     |    |             |              |                 |    |    |    |
| Park et al., 2023 [48]      |    |             |              |                 |    |    |    |
| Kong et al., 2023 [31]      |    |             |              |                 |    |    |    |
| Jang et al., 2022 [57]      |    |             |              |                 |    |    |    |
| Kohlakala et al., 2022 [32] |    |             |              |                 |    |    |    |
| Sukegawa et al., 2022 [30]  |    |             |              |                 |    |    |    |
| Kim et al., 2022 [59]       |  |           |            |               |  |  |  |
| Lee et al., 2022 [60]       |  |           |            |               |  |  |  |
| Benakatti et al., 2021 [56] |  |           |            |               |  |  |  |
| Santos et al., 2021 [49]    |  |           |            |               |  |  |  |
| Sukegawa et al. , 2021 [52] |  |           |            |               |  |  |  |
| Lee et al., 2021 [54]       |  |           |            |               |  |  |  |
| Hadj Saïd et.al, 2020 [46]  |  |           |            |               |  |  |  |
| Lee et al., 2020 [53]       |  |           |            |               |  |  |  |
| Takahashi et al., 2020 [47] |  |           |            |               |  |  |  |
| Sukegawa et al., 2020 [50]  |  |           |            |               |  |  |  |
| Lee & Jong, 2020 [51]       |  |           |            |               |  |  |  |
| Kim et al., 2020 [55]       |  |           |            |               |  |  |  |
|                             |                                                                                     |  Low Risk |  High Risk |  Unclear Risk |                                                                                       |                                                                                       |                                                                                       |
